# Supplementary material for: High-performance polyamides with engineered disorder
Source: Royal Society of Chemistry journal article supplement (doi:10.1039/d1py01225h), 2021-01-01
Supplement: d1py01225h1.pdf [file d1py01225h1.pdf]

# High-Performance Polyamides with Engineered Disorder

## Supporting Information

*Nicolas Candau,<sup>1,2,†</sup> Sylvain Galland,<sup>1,2,†</sup> Julien Cretenoud,<sup>1</sup> Sandor Balog,<sup>3</sup> Véronique Michaud,<sup>2</sup>*

*Jean-Marc Chenal,<sup>4</sup> Olivier Lame,<sup>4</sup> Christopher J.G. Plummer,<sup>1</sup> Holger Frauenrath<sup>1,\*</sup>*

<sup>1</sup> Laboratory of Macromolecular and Organic Materials (LMOM), Institute of Materials (IMX), Ecole Polytechnique Fédérale de Lausanne (EPFL), Station 12, 1015 Lausanne, Switzerland

<sup>2</sup> Laboratory for Processing of Advanced Composites (LPAC), Institute of Materials (IMX), Ecole Polytechnique Fédérale de Lausanne (EPFL), Station 12, 1015 Lausanne, Switzerland

<sup>3</sup> Adolphe Merkle Institute, University of Fribourg, Switzerland

<sup>4</sup> University of Lyon, INSA de Lyon, MATEIS, CNRS, UMR 5510, 69621 Villeurbanne, France

† These authors have equally contributed to the paper

## Glossary

### *Thermomechanical properties*

$\varepsilon_b$ : strain at break (%)

$E$ : Young Modulus (MPa)

$\sigma_y$ : Yield stress (MPa)

$T_g$ : Glass transition (°C)

$T_m$ : melting temperature (°C)

### *Materials*

PA66: poly(hexamethylene adipamide)

PA610: poly(hexamethylene sebacamide)

PA12: poly(lauro lactam)

PA6TI: poly(hexamethylene terephthalamide-co isophthalamide)

PA6T: poly(hexamethylene terephthalamide)

PA6TI-PA66: random copolyamides of PA6TI and PA66

PA6TI-PA610: random copolyamides of PA6TI and PA610

PA6TI/PA12: blends of PA6TI and PA12

T6T: terephthalamide-hexamethylene-terephthalamide sequence

I units: isophthaloyl units

T units: terephthaloyl units

Supplementary Figures S1–S8

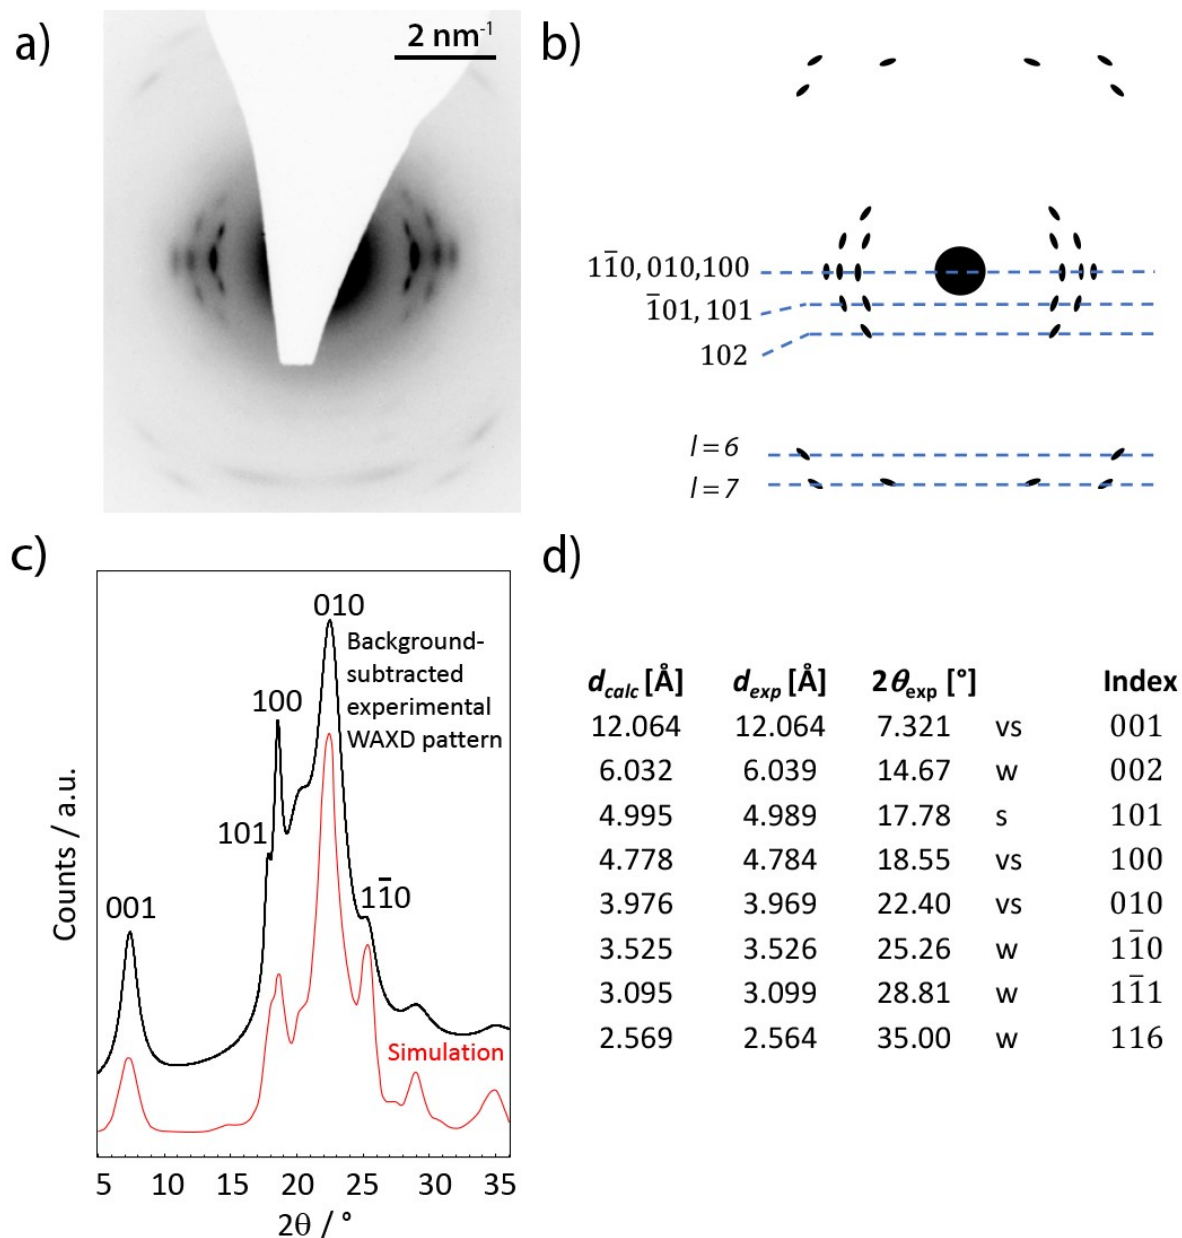

**Fig. S1** a) Electron fiber diffraction pattern from an oriented film of PA6TI (orientation direction vertical). b) Indexing of the electron fiber diffraction pattern according to a triclinic unit cell with lattice parameters  $a = 5.03$  Å,  $b = 5.33$  Å,  $c = 16.42$  Å,  $\alpha = 50.5^\circ$ ,  $\beta = 79.0^\circ$ ,  $\gamma = 94.0^\circ$ . c) Indexed 1D-wide angle X-ray diffraction (WAXD) data from PA6TI compared with a simulated WAXD pattern (in red) corresponding to the model structure in Fig. 2a of the main text. d) Comparison of experimental  $d$ -spacings from WAXD and  $d$ -spacings calculated using the unit cell derived from the electron diffraction pattern in b).

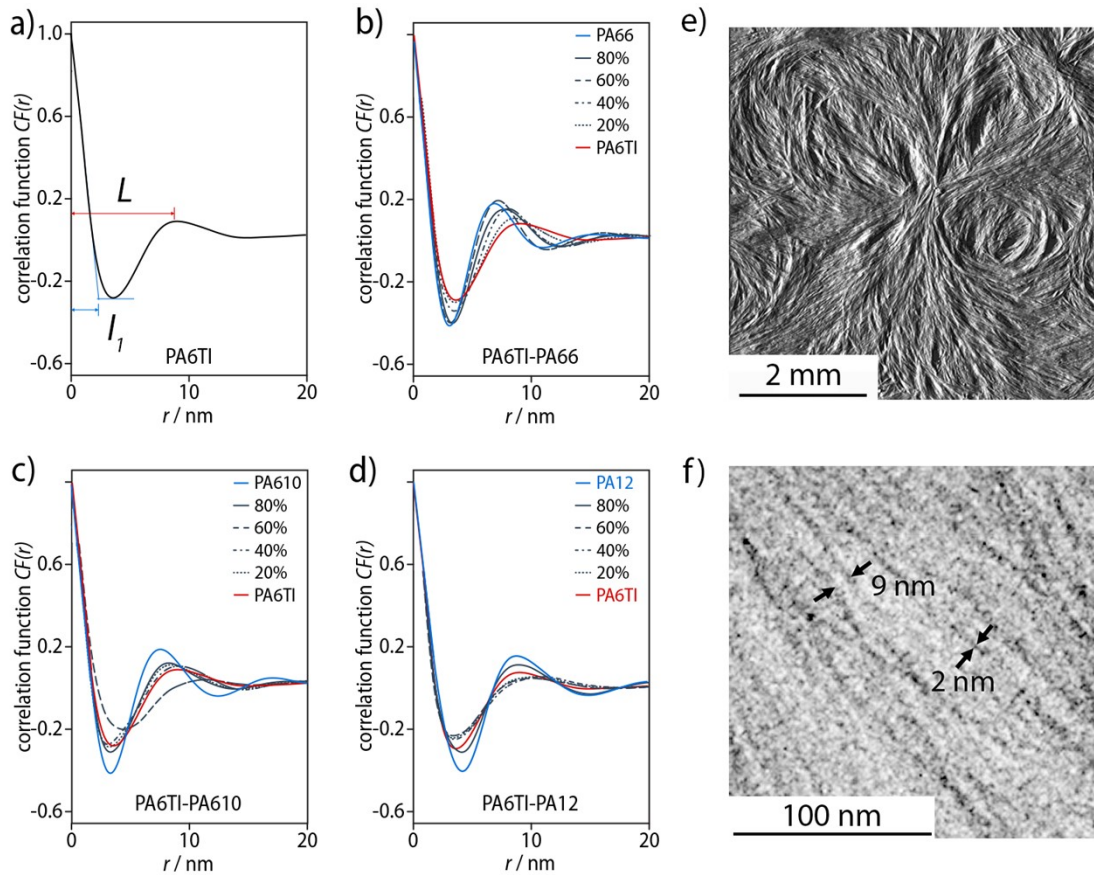

**Fig. S2** a) 1D correlation function from small angle X-ray scattering (SAXS) data for PA6TI, illustrating the determination of the short spacing,  $l_1$ , from the first minimum and the long spacing,  $L$ , from the first maximum.<sup>1,2</sup> b,c,d) 1D correlation functions for melt-compounded PA6TI-PA66, PA6TI-PA610 and PA12 with various compositions. e) Intermittent-contact-mode atomic force microscopy (AFM) amplitude image (Bruker Nanoscope IIIa/MikroMasch NSC14 silicon probe) of a melt-crystallized PA6TI film showing the lamellar semicrystalline morphology characteristic of all the materials considered here.<sup>3</sup> f) Low-dose bright-field transmission electron micrograph (Thermo Scientific Talos™ F200S operated at 200 keV) from a 40 nm thick microtomed film of PA6TI recrystallized on a carbon substrate by cooling from 350 °C at 10 °C/min under nitrogen showing projections of individual lamella (dark regions) with minimum thicknesses of 2–3 nm and spacings of about 9 nm.  $l_1$ , which was about 2 nm for PA6TI, was therefore identified with the lamellar thickness,  $l$ , and  $L$  was identified with the mean lamellar long period.<sup>1,2</sup>

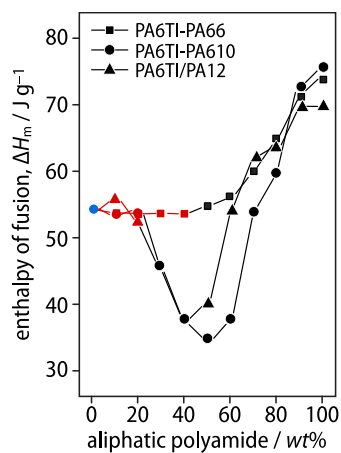

**Fig. S3** Enthalpy of fusion,  $\Delta H_m$ , determined by differential scanning calorimetry (DSC) for the copolyamides PA6TI-PA66 and PA6TI-PA610 as well as the blend PA6TI/PA12 as a function of composition. In materials containing up to 20 wt% of the aliphatic component,  $\Delta H_m$  is insensitive to the nature of the aliphatic component and remains roughly constant (red).  $\Delta H_m$  does not show a minimum in PA6TI-PA66 at intermediate compositions.

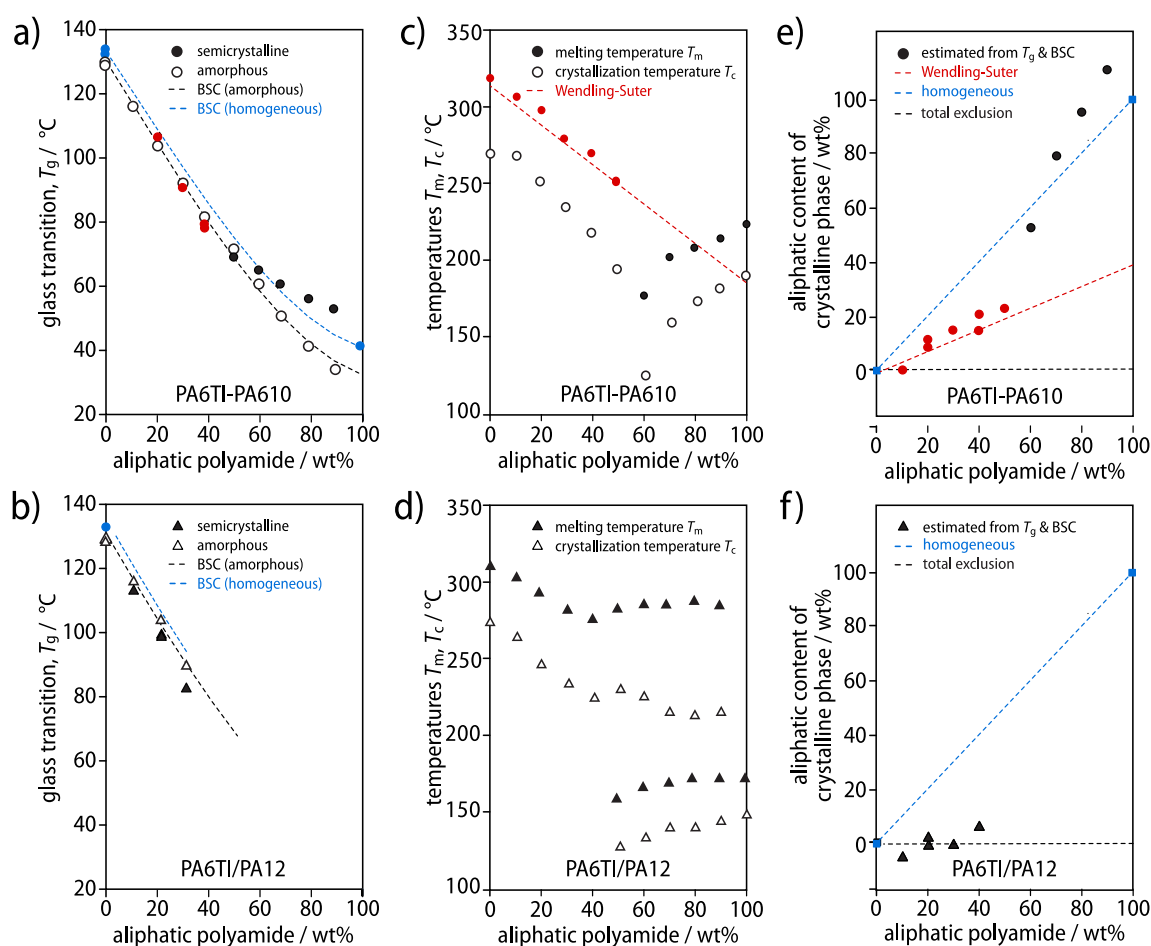

**Fig. S4** *a,b*) Glass transition temperatures,  $T_g$ , corresponding to the mid-point of the calorimetric glass transition observed in DSC heating scans at 10 K/min on fully amorphous specimens of PA6TI-PA610 and PA6TI/PA12, respectively, obtained by quenching from the melt, and semicrystalline specimens obtained by cooling from 330 °C at 10 K/min. A fit to the data for the amorphous specimens (black curve) is obtained by adjusting the parameters  $k_1$  and  $k_2$  in the Brekner-Schneider-Cantow (BSC) expression for miscible binary blends of two components A and B.<sup>4</sup> The confining effect of the lamellae in semicrystalline specimens with a homogeneous distribution of the two components between the amorphous and the crystalline phase is modelled using the same values of  $k_1$  and  $k_2$ , but with  $T_{gA}$  and  $T_{gB}$  shifted to match the experimental  $T_g$  obtained for semicrystalline PA6TI, PA610 or PA12 (dashed blue curve). Deviations between the model  $T_g$  and experimental  $T_g$  are then interpreted to reflect differences between the composition of the amorphous phase and the overall composition (Appendix A). *c,d*) Crystallization peak temperatures,  $T_c$ , as a function of composition for PA6TI-PA610 and PA6TI/PA12 cooled from 330 °C at 10 K/min and melting points,  $T_m$ , obtained from subsequent heating scans together with a fit of the Wendling-Suter expression to  $T_m$  for the random copolymer PA6TI-PA610 (Appendix B). *e,f*) Aliphatic content of the crystalline phase estimated from the  $T_g$  data in *a,b*) and the SAXS data in Fig. 3f, together with values implied by the Wendling-Suter expression used to fit the data in *c*) (red curve).

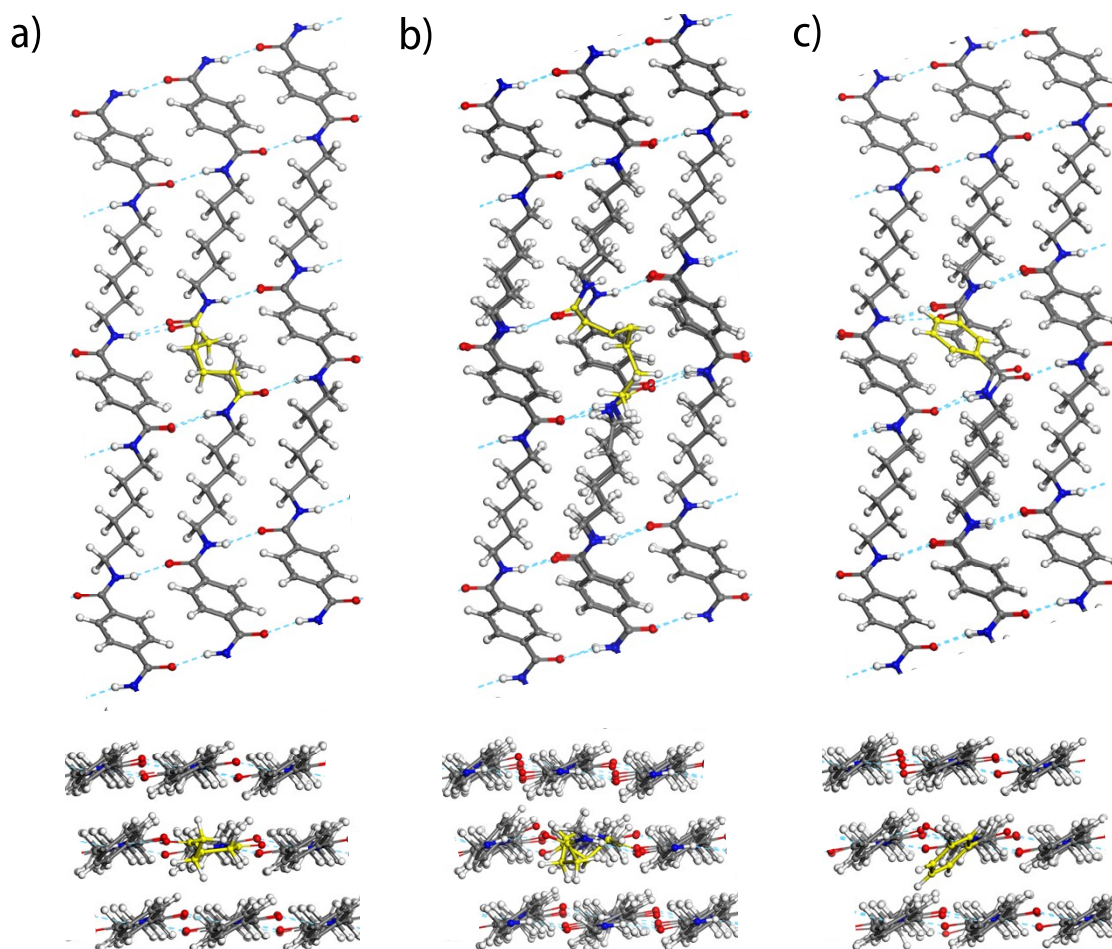

**Fig. S5** Projections along (010) and (001) of relaxed PA6T crystalline structures in which a single terephthaloyl (T) unit has been replaced by *a)* an adipoyl unit, *b)* a sebacoyl unit, or *c)* an isophthaloyl (I) defect unit (highlighted in yellow). The displacement field induced by the defect is in each case associated with atomic displacements of the surrounding chains of less than 1 Å and is limited to chains adjacent to the defect, so that the long-range packing of the PA6T crystal remains unaffected. Introduction of a sebacoyl or an I unit disrupts hydrogen bonding, whereas introduction of an adipoyl unit maintains the original hydrogen bonding pattern of the T unit.

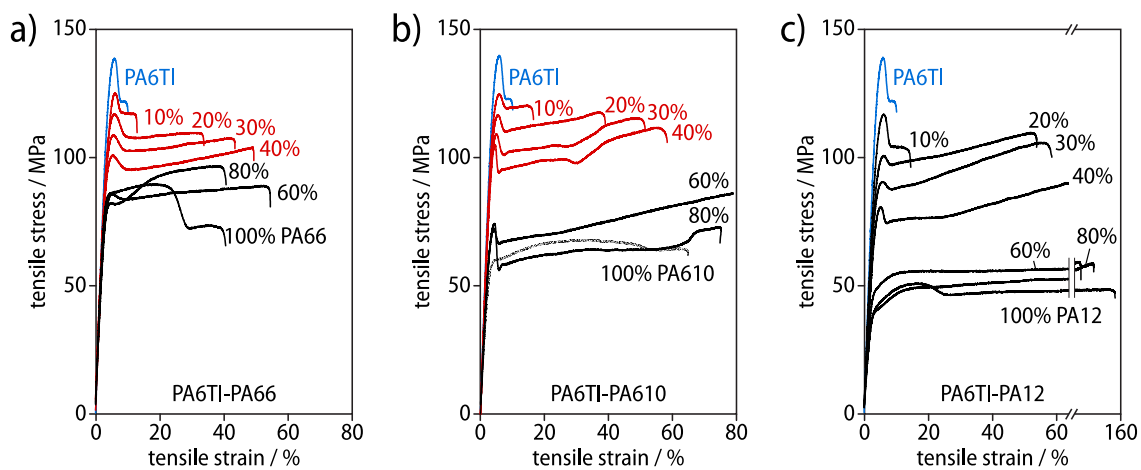

**Fig. S6** *a-c)* Representative stress-strain curves from tensile tests at ambient temperature and 10 mm/min on dry injection moldings of melt compounded PA6TI-PA66, PA6TI-PA610, and PA6TI/PA12 for the aliphatic contents indicated (in wt%).



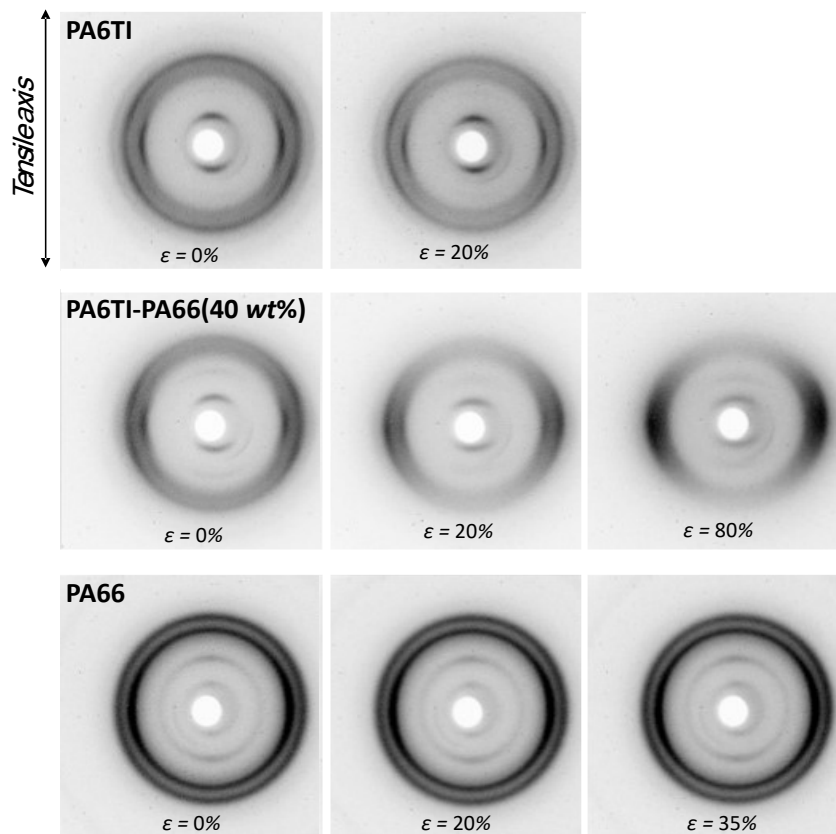

**Fig. S7** 2D-WAXD patterns from PA6TI, PA6TI-PA66(40 wt%), and PA66 obtained in transmission mode in the undeformed state and *in situ* at the nominal tensile strains indicated (specimen/tensile axis vertical). The diffuse asymmetric reflections at Bragg angles of about 10° in the bottom right-hand quadrant for PA6TI and PA6TI-PA66(40 wt%) and in the bottom left-hand quadrant for PA66 are artefacts due to diffusion from a Kapton window placed at the end of the X-ray tube.

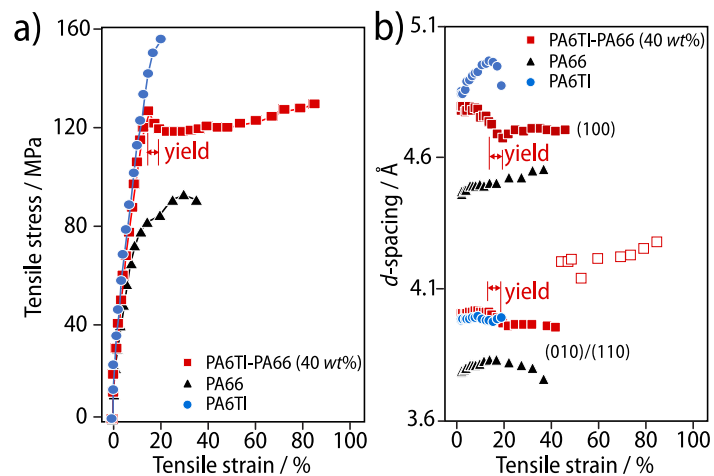

**Fig. S8** *a)* Stress-strain behavior corresponding to the *in situ* WAXD experiments. The tensile stress is the average value of the stress measured during recording of the 2D-WAXD pattern (see the Experimental Part S3). *b)* The (100) and (010) spacings (the (110)/(010) spacings in the case of PA66) of PA6TI, PA6TI-PA66(40 wt%), and PA66 as a function of tensile strain.

## Appendix A: Determination of the Composition of the Amorphous Phase from $T_g$ Measurements

In amorphous specimens of the copolymers prepared by quenching from the melt,  $T_g$  shows a monotonic decrease with increasing aliphatic content that may be fitted using the Brekner-Schneider-Cantow expression (1) for miscible binary blends of two components  $A$  and  $B$ :<sup>4</sup>

$$T_g(\phi) = T_{gA} + (T_{gB} - T_{gA})[(1 + k_1)\phi - (k_1 + k_2)\phi^2 + k_2\phi^3] \quad (\text{A1})$$

where  $\phi$  is the mass fraction of component  $B$ , and  $k_1$  and  $k_2$  are empirical constants. After crystallization by cooling from 330 °C at 10 K/min, conditions that closely reproduce the melting behavior of the injection moldings,  $T_g$  increases in PA6TI and in the aliphatic homopolymers, presumably owing to confinement by the crystalline phase. The dashed red lines in Fig. 4a-c are obtained by interpolating the Brekner-Schneider-Cantow (BSC) expression using the same parameters  $k_1$  and  $k_2$  as for the fully amorphous specimens (the dashed red lines in Fig. 3a-c) but adjusting  $T_{gA}$  and  $T_{gB}$  to take into account the shifts associated with crystallization. We then assume deviations between the measured  $T_g$  in the semicrystalline specimens and the  $T_g$  values obtained by interpolation to reflect preferential segregation of the aliphatic units to either the amorphous or the crystalline phase. Expulsion of I units into the amorphous phase during crystallization of PA6TI was assumed to have a negligible influence on  $T_g$  given the comparable  $T_g$  of PA6TI and PA6I ( $T_g \approx 124$  °C for PA6I as opposed to  $T_g \approx 130$  °C for PA6TI). The local composition of the amorphous phase may hence be estimated directly from the measured  $T_g$  and the BSC expression, and the composition of the crystalline phase (Fig. 4d) may in turn be determined from the overall degree of crystallinity implied by Fig. 3f.

## Appendix B. The Melting Point, $T_m$ , as a Function of Comonomer Content

The equilibrium melting point of a polymer with infinite molar mass is given by

$$T_m^0 = \frac{\Delta H_m^0}{\Delta S_m^0} \quad (\text{A2}),$$

where  $\Delta H_m^0$  and  $\Delta S_m^0$  are the molar enthalpy of fusion and the molar entropy of fusion.  $\Delta H_m^0$  for PA6T may be estimated from  $\Delta H_m/\chi_w \approx 234 \text{ J/g}$  where  $\Delta H_m$  and  $\chi_w$  are the observed enthalpy of fusion [J/g] and mass fraction of crystallinity in PA6TI, assuming the I units to be excluded from the crystalline phase ( $\chi_w$  is estimated from the SAXS value for  $\chi$ , assuming crystalline and amorphous densities of  $1.25 \text{ g/cm}^3$  and  $1.1 \text{ g/cm}^3$  for PA6TI). This leads to  $\Delta H_m^0 \approx 56.4 \text{ kJ/mol}$ , which is close to literature values of  $56.5 \text{ kJ/mol}$  for PA66, indicating the much higher melting point of PA6T (around  $360 \text{ }^\circ\text{C}$ ) than that of PA66 moldings (about  $260 \text{ }^\circ\text{C}$ ) to be primarily due to differences in chain stiffness, through their influence on  $\Delta S_m^0$ .  $T_m^0$  is not well known for polyamides but is assumed to be about  $40 \text{ K}$  higher than  $T_m$  in the present case,<sup>5</sup> which leads to  $\Delta S_{PA66}^0 = 98.6$  and  $\Delta S_{PA6T}^0 = 83.8 \text{ J/K/mol}$  for PA66 and PA6T respectively.  $\Delta S_m^0$  is further assumed to be inversely proportional to the Kuhn length  $b$  so that  $\Delta S_m^0(X)$  in a hypothetical crystal containing a mole fraction  $X$  of PA66 units is

$$\Delta S_m^0(X) = \frac{\Delta S_{PA6T}^0}{1 - X + X \frac{\Delta S_{PA6T}^0}{\Delta S_{PA66}^0}} \quad (\text{A3}).$$

If  $\Delta H_m^0$  is independent of  $X$ ,

$$T_m^0(X) = \frac{\Delta H_m^0}{\Delta S_{PA6T}^0} \left( 1 - X + X \frac{\Delta S_{PA6T}^0}{\Delta S_{PA66}^0} \right) \quad (\text{A4}).$$

According to the approach of Wendling and Suter,<sup>6</sup> modified to include three types of comonomer,  $A$ ,  $B$  and  $C$ , where  $B$  may coexist with  $A$  in the crystalline phase with an energy penalty  $\varepsilon$ , but  $C$  is entirely excluded:

$$\frac{1}{T_m^0(X)} - \frac{1}{T_m} = \frac{R}{\Delta H_m^0} \left\{ \ln \left( 1 - X_B - X_C + X_B \exp \left( -\frac{\varepsilon}{RT_C} \right) \right) - \langle \xi \rangle^{-1} \right\} \quad (\text{A5}),$$

where

$$\langle \xi \rangle^{-1} = 2 \left( \left( X_B + X_c - X_B \exp\left(-\frac{\varepsilon}{RT_c}\right) \right) \cdot \left( 1 - X_B - X_c + X_B \exp\left(-\frac{\varepsilon}{RT_c}\right) \right) \right) \quad (\text{A6}),$$

$T_c$  is the crystallization temperature and  $R$  is the universal gas constant. For 70:30 PA6TI containing a mole fraction  $X_B$  of PA66 units, the proportion  $X_c$  of I units is given by

$$X_c = 0.3(1 - X_B) \quad (\text{A7})$$

and  $T_m^0(X)$  in Equation A5 is estimated by setting  $X = X_B$  in Equation A4.

## References

1. G. R. Strobl and M. Schneider, Direct evaluation of the electron density correlation function of partially crystalline polymers, *Journal of Polymer Science, Polymer Physics Edition*, 1980, **18**, 1343.
2. Z.-G. Wang, B. S. Hsiao, B. X. Fu, L. Liu, F. Yeh, B. B. Sauer, H. Chang, J. M. Schultz, Correct determination of crystal lamellar thickness in semicrystalline poly(ethylene terephthalate) by small-angle X-ray scattering, *Polymer*, 2000, **41**, 1791–1797.
3. J. Cretenoud, S. Galland, C. J. G. Plummer, V. Michaud, A. Bayer, N. Lamberts, B. Hoffmann and H. Frauenrath, High-temperature copolyamides obtained by the efficient transamidation of crystalline–crystalline polyamide blends, *Journal of Applied Polymer Science*, 2017, **134**, 44349.
4. M.-J. Brekner, H. A. Schneider and H.-J. Cantow, Approach to the composition dependence of the glass transition temperature of compatible polymer blends: 1, *Polymer*, 1988, **29**, 78–85.
5. J. H. Magill, M. Girolamo and A. Keller, Crystallization and morphology of nylon-6,6 crystals: 1. Solution crystallization and solution annealing behaviour, *Polymer*, 1982, **22**, 43–55.
6. J. Wendling and U. W. Suter, A New Model Describing the Cocrystallization Behavior of Random Copolymers, *Macromolecules*, 1998, **31**, 2516–2520.
